# Supplementary material for: A spiroacridine-based thermally activated delayed fluorescence emitter for high-efficiency and narrow-band deep-blue OLEDs
Source: Royal Society of Chemistry journal article supplement (doi:10.1039/d4cc00154k), 2024-01-01
Supplement: d4cc00154k1.pdf [file d4cc00154k1.pdf]

Electronic Supplementary Material (ESI) for ChemComm.  
This journal is © The Royal Society of Chemistry 2024

## Supporting Information

### **A Spiroacridine-Based Thermally Activated Delayed Fluorescence Emitter for High-Efficiency and Narrow-Band Deep-Blue OLEDs**

Yong Huang,<sup>‡a</sup> Mengjiao Jia,<sup>‡a</sup> Chuan Li,<sup>a</sup> Yang Yang,<sup>a</sup> Yuling He,<sup>a</sup> Yanju Luo,<sup>\*b</sup>  
Yan Huang,<sup>a</sup> Liang Zhou,<sup>\*c</sup> and Zhiyun Lu<sup>\*a</sup>

<sup>a</sup> *Key Laboratory of Green Chemistry and Technology (Ministry of Education), College of Chemistry, Sichuan University, Chengdu, Sichuan 610064, China. E-mail: luzhiyun@scu.edu.cn.*

<sup>b</sup> *Analytical & Testing Center, Sichuan University, Chengdu, Sichuan 610064, China. E-mail: luoyanju@scu.edu.cn.*

<sup>c</sup> *State Key Laboratory of Rare Earth Resource Utilization Changchun Institute of Applied Chemistry Chinese Academy of Sciences, Changchun, 130022, China. E-mail: zhoul@ciac.ac.cn.*

---

## I. Experimental details

### 1. General Information

**Materials.** Unless otherwise described, all reagents and anhydrous solvents were purchased from commercial sources and used without further purification. All the solvents used in photophysical measurements were of analytical grades and freshly distilled before use. The target compound **SAC-BOC** was purified through three times recrystallization followed by vacuum sublimation. **DPEPO** and other OLED materials were purchased from Luminescence Technology Corporation and were used without further purification.

**General method.**  $^1\text{H}$  NMR and  $^{13}\text{C}$  NMR spectra were recorded on a Bruker AVANCE II-400 MHz spectrometer at 400 and 100 MHz in  $\text{CDCl}_3$ , respectively. Tetramethylsilane (TMS) was used as an internal standard. All chemical shift data were reported in the standard  $\delta$  notation of parts per million (ppm). Splitting patterns were designed as follows: s (singlet), d (doublet), t (triplet) and m (multiplet). High resolution MS spectra were measured on a Q-TOF Premier ESI mass spectrometer (Micromass, Manchester, UK). UV-visible absorption spectra were measured on an AOE A590 spectrophotometer. Steady-state photoluminescence (PL) spectra at room temperature (RT) and phosphorescence spectra at 77 K were measured on a Horiba Jobin Yvon Fluoromax-Plus-P fluorescence spectrophotometer. PL quantum efficiency data were measured on a Hamamatsu UV-NIR (C13534) absolute PL quantum yield spectrometer. Transient PL decay profiles at RT under  $\text{N}_2$  atmosphere were recorded on a Horiba Jobin Yvon FluoroHub-B equipped with a single photon counting controller. Single crystal X-ray diffraction data was obtained on an Xcalibur E X-ray single crystal diffractometer equipped with a graphite monochromator  $\text{Mo-K}\alpha$  ( $\lambda = 0.71073 \text{ \AA}$ ) radiation. Single crystal samples of **SAC-BOC** were obtained by slow evaporation of saturated solution from mixed solvents (dichloromethane and ethanol) at room temperature. The crystallographic data for **SAC-BOC** reported here has been deposited in the Cambridge Structural Database with CCDC number of 2308268.

**Computational method.** The initial geometry of **SAC-BOC** was extracted from its single crystal structure and then further optimized. The geometry of the ground state ( $S_0$ ) was optimized at density functional theory (DFT) level using B3LYP hybrid functional and 6-31G(d) basis. The geometries of the excited states were optimized using time-dependent DFT (TD-DFT) method with CAM-B3LYP density functional. Furthermore, the energy of individual excited states was obtained using  $\omega\text{B97XD}$  functional with a basis of 6-31+G(d)

based on their respective optimized molecular geometries accordingly. The calculations described above were performed using Gaussian 16 software package. The solvent effect in all the calculations was conducted using the polarizable continuum model (toluene). ORCA 5.0.4 program was used to obtain spin-orbit coupling matrix element ( $\zeta$ ) between lowest-lying singlet excited state and triplet excited states of **SAC-BOC**<sup>[1]</sup>. To calculate the reorganization energy, the Dushin program was utilized.<sup>[2]</sup> The associated Huang-Rhys factor ( $S$ ) was calculated with  $S_i = \lambda_i / (h \cdot \nu_i)$  formula. Here, the symbol  $\lambda_i$  represents the decomposed reorganization energy,  $\nu_i$  denotes the frequency of normal vibration mode,  $h$  represents Planck constant.

## 2. Synthetic procedures and characterization data

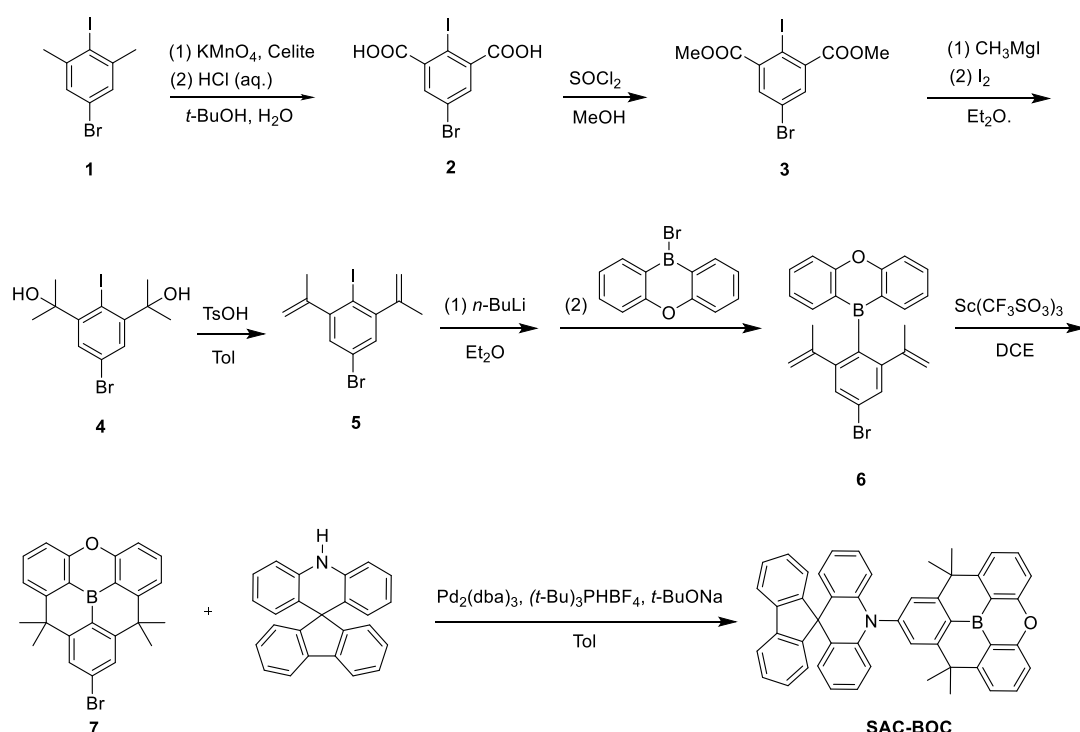

**Scheme S1.** Synthetic route to compound **SAC-BOC**.

The intermediates **2** and **3** were synthesized according to reported procedures.<sup>[3]</sup>

### Synthesis of 1,1'-(5-bromo-2-iodo-1,3-phenylene)bis(ethan-1-ol) (**4**)

To a solution of **3** (12 g, 30 mmol) in toluene (100 mL), a Grignard reagent,  $\text{CH}_3\text{MgI}$  (60 mL, 3.0 M, 180 mmol), was slowly added. The reaction mixture was refluxed with continuous stirring for 2 hours. After that,  $\text{I}_2$  (11.4 g, 45 mmol) in THF (50 mL) was slowly added. The reaction mixture was stirred at room temperature for 1 hour. The reaction was quenched by adding saturated aqueous solutions of  $\text{NH}_4\text{Cl}$  and  $\text{Na}_2\text{S}_2\text{O}_3$ . The organic layer was extracted with dichloromethane (DCM) three times. Subsequently, the organic extracts were washed

---

using a saturated aqueous solution of NaHCO<sub>3</sub> and brine, then dried over MgSO<sub>4</sub>, filtration and evaporated under reduced pressure. The mixture was purified by recrystallization with DCM. This step yielded 5.45 g of **4** in a 45.5% yield as a faint yellow solid. <sup>1</sup>H NMR (400 MHz, CDCl<sub>3</sub>) δ (ppm): 7.71 (s, 2H, ArH), 1.84 (s, 12H, CH<sub>3</sub>).

#### **Synthesis of 5-bromo-2-iodo-1,3-di(prop-1-en-2-yl)benzene (5)**

In a reaction vessel, a solution of **4** (2.77g, 6.94 mmol) and *p*-toluenesulfonic acid (0.239 g, 1.39 mmol) in toluene (35 mL) was heated under reflux in air for 1 hour. After cooling to room temperature, the reaction mixture was neutralized by addition of a saturated aqueous solution of NaHCO<sub>3</sub>. Then the organic layer was extracted with DCM three times. The organic extracts were washed with brine and dried over MgSO<sub>4</sub>. The solution was then filtered, and volatiles were evaporated under reduced pressure. The crude product was further purified using column chromatography on silica gel with PE (Petroleum ether) as the eluent. This step yielded 2.38 g of **5** in a 95% yield as a white solid. <sup>1</sup>H NMR (400 MHz, CDCl<sub>3</sub>) δ (ppm): 7.18 (s, 2H, ArH), 5.22 (s, 2H, CH), 4.90 (s, 2H, CH), 2.06 (s, 6H, CH<sub>3</sub>).

#### **Synthesis of 10-(4-bromo-2,6-di(prop-1-en-2-yl)phenyl)-10H-dibenzo[*b,e*][1,4]oxaborinine (6)**

At -78 °C, a solution of *n*-BuLi in hexane (6.25 mmol, 2.5 M, 2.5 mL) was added dropwise to a solution of **5** (2 g, 5.53 mmol) in dry ether (80 mL). The resulting mixture was at this temperature for 1 hour. A solution of 9-bromo-9,10-dihydro-9-boraanthracene (Prepared from bis[2-(trimethylsilyl)-phenyl] ether (1.6g, 6.18 mmol) and BBr<sub>3</sub> (7.0 mmol) according to the reference,<sup>[4]</sup> the difference is that the reaction solvent and remaining BBr<sub>3</sub> are directly removed by a vacuum oil pump equipped with cold hydrazine, and then the resulted yellow compound is dissolved in dry ether for the next reaction step) in dry (20 mL) was then added dropwise to the reaction mixture at -78 °C. After the addition was completed, the reaction mixture was allowed to slowly rise to room temperature and stirred overnight. The reaction was quenched with a saturated aqueous solution of NaHCO<sub>3</sub> and extracted with DCM three times. The organic extracts were washed with brine and dried over MgSO<sub>4</sub>. After filtration, volatiles were evaporated under reduced pressure. The crude product was further purified by column chromatography on silica gel using PE as the eluent. This step gave 1.18g of **6** as a white solid with a yield of 51.4%. <sup>1</sup>H NMR (400 MHz, CDCl<sub>3</sub>) δ (ppm): 7.69-7.64 (m, 4H, ArH), 7.50 (d, *J* = 8.4 Hz, 2H, ArH) 7.46 (s, 2H, ArH) 7.19 (t, *J* = 7.2 Hz, 2H, ArH) 4.64 (s, 2H, CH) 4.46 (s, 2H, CH) 1.87 (s, 6H, CH<sub>3</sub>).

---

### Synthesis of 10-bromo-8,8,12,12-tetramethyl-8,12-dihydro-4-oxa-3a<sup>2</sup>-boradibenzo[*cd,mn*]pyrene (7)

To a solution of **6** (1.0 g, 2.4 mmol) and Sc(OTf)<sub>3</sub> (2.36 g, 4.8 mmol) in 1,2-dichloroethane (800 mL), reflux was maintained with stirring for 4 days. The reaction mixture was allowed to cool to room temperature, following which a saturated aqueous solution of NaHCO<sub>3</sub> was added to it. The organic layer was extracted three times with dichloromethane, and the organic extract was dried over MgSO<sub>4</sub>. After filtration, the volatiles were evaporated under reduced pressure. The crude product was purified using column chromatography on silica gel with PE as the eluent, giving 535 mg of **7** in 53.5% yield as a white solid. <sup>1</sup>H NMR (400 MHz, CDCl<sub>3</sub>) δ (ppm): 7.81-7.77 (m, 4H, ArH), 7.51 (d, *J* = 7.6 Hz, 2H, ArH) 7.40 (d, *J* = 8.4 Hz, 2H, ArH) 1.78 (s, 12H, CH<sub>3</sub>).

### Synthesis of 10-(8,8,12,12-tetramethyl-8,12-dihydro-4-oxa-3a<sup>2</sup>-boradibenzo[*cd,mn*]pyren-10-yl)-10*H*-spiro[acridine-9,9'-fluorene] (SAC-BOC)

In a Schlenk tube, 235 mg (0.57 mmol) of **7**, 216 mg (0.65 mmol) 10*H*-spiro[acridine-9,9'-fluorene], 52 mg (0.057 mmol) of tris(dibenzylideneacetone)dipalladium, 66 mg (0.23 mmol) of tri-*tert*-butylphosphine tetrafluoroborate, 140 mg (1.5 mmol) of sodium *tert*-butoxide and 6 mL dry toluene were charged. Degassed by 3 cycles of freeze-pump-thaw. The solution was stirred at 110 °C for 48 hours. After cooling to room temperature, insoluble compounds were filtered under reduced pressure and the residue was washed with DCM. The solvent was evaporated and the crude compound was purified via column chromatography with PE: DCM = 5: 1 as solvent system and recrystallization, resulting in 250 mg of white powder product with a yield of 66%. <sup>1</sup>H NMR (400 MHz, CDCl<sub>3</sub>) δ(ppm): 7.84 (m, 4H, ArH), 7.73 (s, 2H, ArH), 7.58 (d, *J* = 7.6 Hz, 2H, ArH), 7.53 (t, *J* = 7.6 Hz, 2H, ArH), 7.46 (d, *J* = 8.0 Hz, 2H, ArH), 7.41 (t, *J* = 7.6 Hz, 2H, ArH), 7.32 (t, *J* = 7.6 Hz, 2H, ArH), 6.94 (m, 2H, ArH), 6.59 (t, *J* = 7.6 Hz, 2H, ArH), 6.45 (d, *J* = 8.0 Hz, 4H, ArH), 1.87 (s, 12H, CH<sub>3</sub>). <sup>13</sup>C NMR (100 MHz, CDCl<sub>3</sub>) δ 159.0, 158.9, 157.0, 155.8, 145.3, 141.4, 139.3, 134.7, 128.5, 128.0, 127.6, 127.4, 126.7, 126.0, 124.7, 120.5, 120.3, 119.9, 114.6, 113.7, 43.7, 34.1, 29.7. HRMS (ESI): calcd.: 666.2963 [M + H]<sup>+</sup>; found: 666.2965.

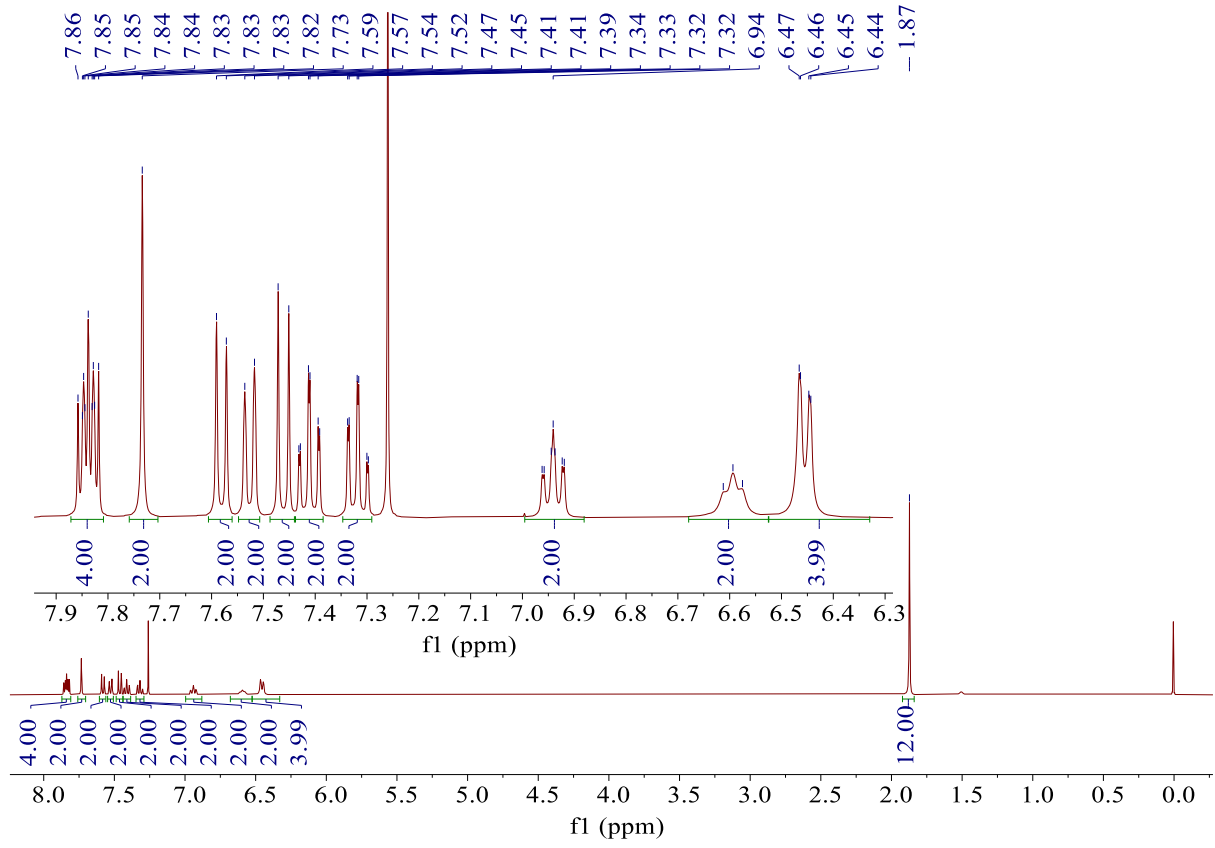

Fig. S1 The  $^1\text{H}$  NMR spectrum of SAC-BOC in  $\text{CDCl}_3$ .

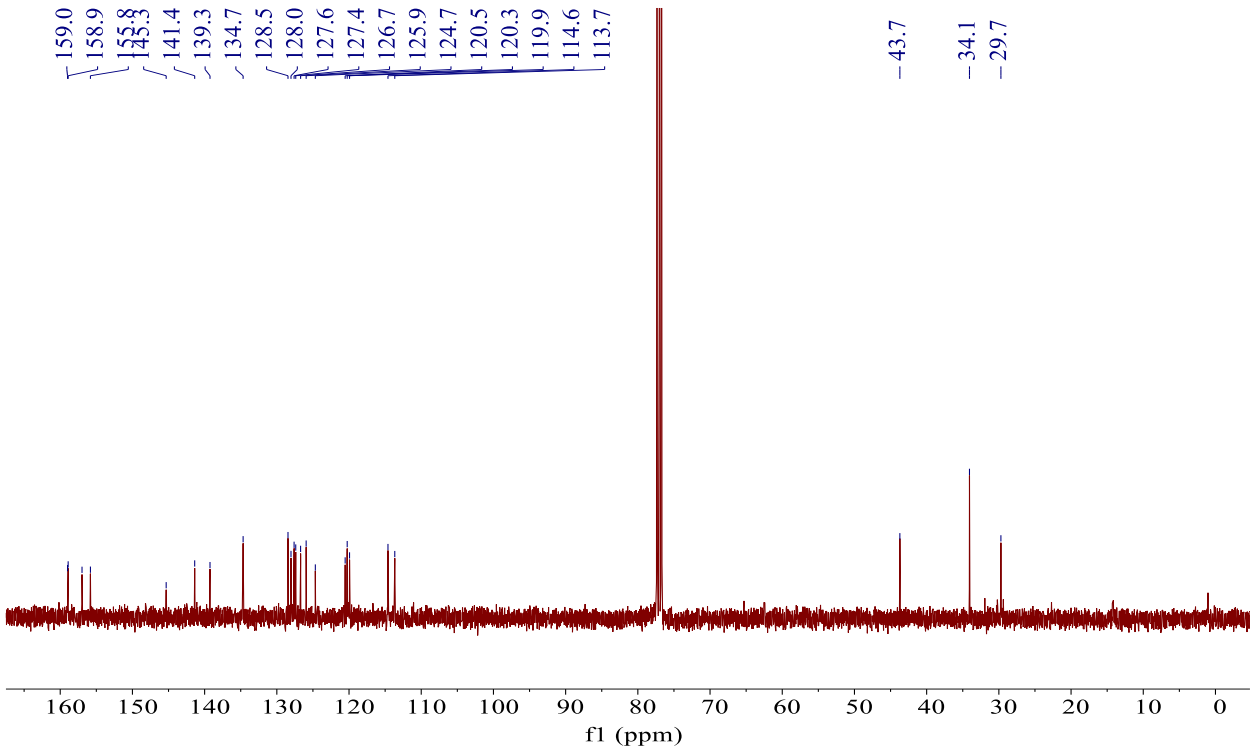

Fig. S2 The  $^{13}\text{C}$  NMR spectrum of SAC-BOC in  $\text{CDCl}_3$ .

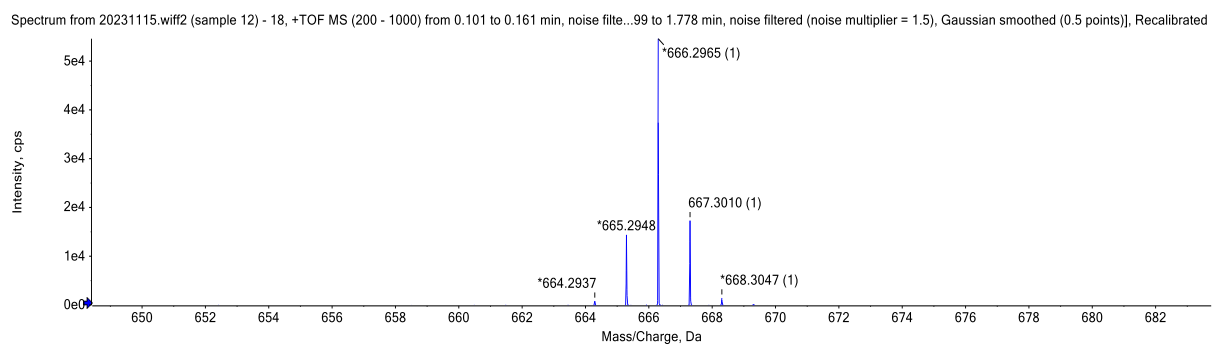

**Fig. S3** The high resolution ESI mass spectrum of **SAC-BOC**.  $C_{49}H_{36}BNOH^+ [M + H]^+$ . Calcd.: 666.2963; found: 666.2965.

## II. Characterization

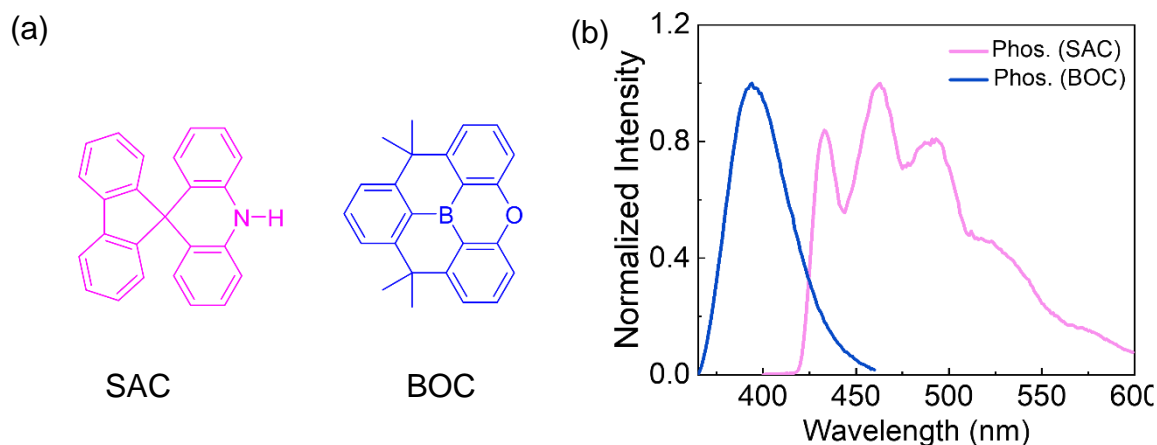

**Fig. S4** (a) The chemical structure of SAC and BOC. (b) Phosphorescence spectra of BOC in methyl cyclohexane (77 K, delay 200 ms) and SAC in 2-MeTHF (77 K, delay 10 ms).

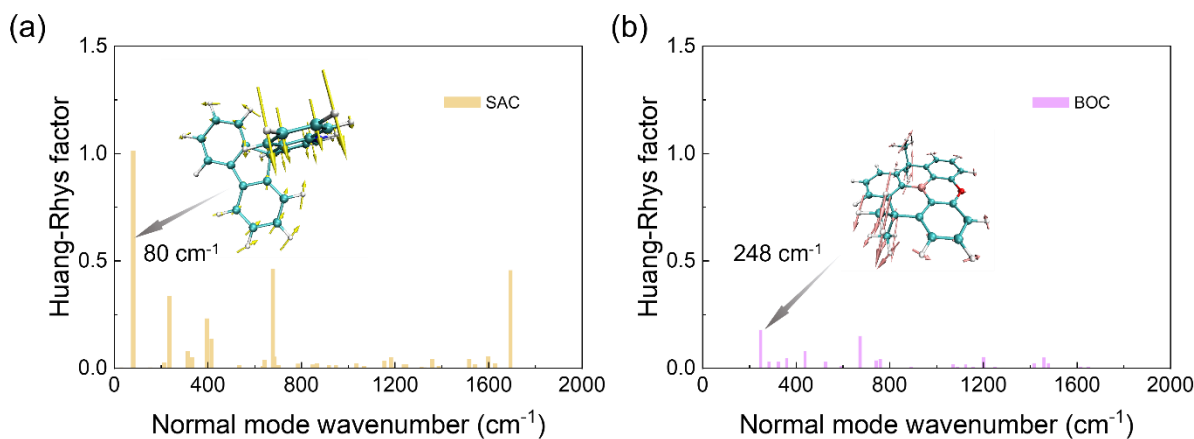

**Fig. S5** (a) Huang-Rhys factor of a) SAC and b) BOC from the  $S_1$  to  $S_0$  states (inset: the vibration mode with the largest contribution to the Huang-Rhys factor).

The total reorganization energy ( $\lambda_{\text{total}}$ ) between the  $S_0$  and  $S_1$  states was calculated to be 0.52 and 0.17 eV for SAC and BOC subunits, respectively. These relatively small  $\lambda_{\text{total}}$  for BOC and SAC units indicated the excellent structural rigidity for the both building units.

**Table S1** Electrochemical, thermal stability properties and photophysical data.

| $E_{\text{HOMO}}^a$<br>(eV) | $E_{\text{LUMO}}^b$<br>(eV) | $T_m/T_d^c$<br>(°C) | $\lambda_{\text{abs}}^d$<br>(nm) | $\lambda_{\text{em}}^d$<br>(nm) | FWHM <sup>d</sup><br>(nm) | $\Delta E_g^e$<br>(eV) |
|-----------------------------|-----------------------------|---------------------|----------------------------------|---------------------------------|---------------------------|------------------------|
| -5.38                       | -2.38                       | 352/381             | 356                              | 455                             | 61                        | 3.00                   |

<sup>a</sup>  $E_{\text{HOMO}}$  was calculated from the oxidation potential in dichloromethane. <sup>b</sup>  $E_{\text{LUMO}}$  was calculated according to the equation  $E_{\text{LUMO}} = E_{\text{HOMO}} + \Delta E_g$ . <sup>c</sup> Melting point /thermal decomposition temperature. <sup>d</sup> Measured in toluene ( $1 \times 10^{-5}$  M). <sup>e</sup> Optical energy gap determined from absorption spectrum.



**Table S2** Dynamics data of 20 wt% **SAC-BOC** doped film in DPEPO.

| $\Phi_{\text{PL}}$ | $\Phi_{\text{PF}}$ | $\Phi_{\text{DF}}$ | $\tau_{\text{PF}}$<br>(ns) | $\tau_{\text{DF}}$<br>( $\mu\text{s}$ ) | $k_{\text{PF}}$<br>$10^7 \text{ s}^{-1}$ | $k_{\text{DF}}$<br>$10^5 \text{ s}^{-1}$ | $k_{\text{r}}^{\text{s}}$<br>$10^7 \text{ s}^{-1}$ | $k_{\text{ISC}}$<br>$10^7 \text{ s}^{-1}$ | $k_{\text{RISC}}$<br>$10^5 \text{ s}^{-1}$ |
|--------------------|--------------------|--------------------|----------------------------|-----------------------------------------|------------------------------------------|------------------------------------------|----------------------------------------------------|-------------------------------------------|--------------------------------------------|
| 63%                | 33%                | 30%                | 18                         | 6.3                                     | 5.6                                      | 1.6                                      | 1.8                                                | 3.7                                       | 4.7                                        |

$\Phi_{\text{PF}}$  is the PLQY of prompt fluorescence component and  $\Phi_{\text{DF}}$  is PLQY of TADF component;  $k_{\text{PF}}$  is prompt decay rate constant;  $k_{\text{DF}}$  is delayed decay rate constant;  $k_{\text{r}}^{\text{s}}$  is radiative rate constant of singlet excitons;  $k_{\text{ISC}}$  is intersystem crossing rate constant;  $k_{\text{RISC}}$  is reverse intersystem crossing rate constant.

$$\Phi_{\text{PF}} = \frac{k_{\text{r}}^{\text{s}}}{k_{\text{r}}^{\text{s}} + k_{\text{nr}}^{\text{s}} + k_{\text{ISC}}} \quad (1)$$

$$k_{\text{PF}} = \frac{1}{\tau_{\text{PF}}} \quad (2)$$

$$k_{\text{DF}} = \frac{1}{\tau_{\text{DF}}} \quad (3)$$

assuming, (i)  $k_{\text{PF}} \gg k_{\text{DF}}$ , (ii)  $k_{\text{r}}^{\text{s}} \gg k_{\text{nr}}^{\text{s}}$ ,  $k_{\text{RISC}}$  and (iii)  $k_{\text{RISC}} \gg k_{\text{r}}^{\text{T}}$ ,  $k_{\text{nr}}^{\text{T}}$ ;

$$k_{\text{PF}} \approx k_{\text{r}}^{\text{s}} + k_{\text{ISC}} \quad (4)$$

$$k_{\text{PF}} k_{\text{DF}} \approx k_{\text{r}}^{\text{s}} k_{\text{RISC}} \quad (5)$$

$$k_{\text{ISC}} = k_{\text{PF}} \frac{\Phi_{\text{DF}}}{\Phi_{\text{DF}} + \Phi_{\text{PF}}} \quad (6)$$

$$\Phi_{\text{PF}} \approx \frac{k_{\text{r}}^{\text{s}}}{k_{\text{r}}^{\text{s}} + k_{\text{ISC}}} = \frac{k_{\text{r}}^{\text{s}}}{k_{\text{PF}}} \quad (7)$$

$$k_{\text{ISC}} \approx k_{\text{PF}} - k_{\text{r}}^{\text{s}} = k_{\text{PF}}(1 - \Phi_{\text{PF}}) \quad (8)$$

$$k_{\text{RISC}} \approx \frac{k_{\text{PF}} \cdot k_{\text{DF}}}{k_{\text{PF}} - k_{\text{ISC}}} \quad (9)$$

**Table S3** Structure data of **SAC-BOC** single crystal.

| Empirical formula                           | C <sub>49</sub> H <sub>36</sub> BNO (2 CH <sub>2</sub> Cl <sub>2</sub> ) |
|---------------------------------------------|--------------------------------------------------------------------------|
| Formula weight                              | 835.45                                                                   |
| Temperature/K                               | 150.0                                                                    |
| Crystal system                              | triclinic                                                                |
| Space group                                 | P-1                                                                      |
| a/Å                                         | 9.2148(4)                                                                |
| b/Å                                         | 13.8751(7)                                                               |
| c/Å                                         | 16.7722(8)                                                               |
| α/°                                         | 74.990(2)                                                                |
| β/°                                         | 87.948(2)                                                                |
| γ/°                                         | 80.579(2)                                                                |
| Volume/Å <sup>3</sup>                       | 2043.28(17)                                                              |
| Z                                           | 2                                                                        |
| ρ <sub>calc</sub> /cm <sup>3</sup>          | 1.358                                                                    |
| μ/mm <sup>-1</sup>                          | 0.331                                                                    |
| F(000)                                      | 868.0                                                                    |
| Crystal size/mm <sup>3</sup>                | 0.44 × 0.37 × 0.1                                                        |
| Radiation                                   | MoKα (λ = 0.71073)                                                       |
| 2θ range for data collection/°              | 4.48 to 55.052                                                           |
| Index ranges                                | -11 ≤ h ≤ 10, -18 ≤ k ≤ 18, -21 ≤ l ≤ 21                                 |
| Reflections collected                       | 56158                                                                    |
| Independent reflections                     | 9376 [R <sub>int</sub> = 0.1033, R <sub>sigma</sub> = 0.0669]            |
| Data/restraints/parameters                  | 9376/0/527                                                               |
| Goodness-of-fit on F <sup>2</sup>           | 1.038                                                                    |
| Final R indexes [I ≥ 2σ (I)]                | R <sub>1</sub> = 0.0620, wR <sub>2</sub> = 0.1602                        |
| Final R indexes [all data]                  | R <sub>1</sub> = 0.0869, wR <sub>2</sub> = 0.1776                        |
| Largest diff. peak/hole / e Å <sup>-3</sup> | 0.80/-0.91                                                               |

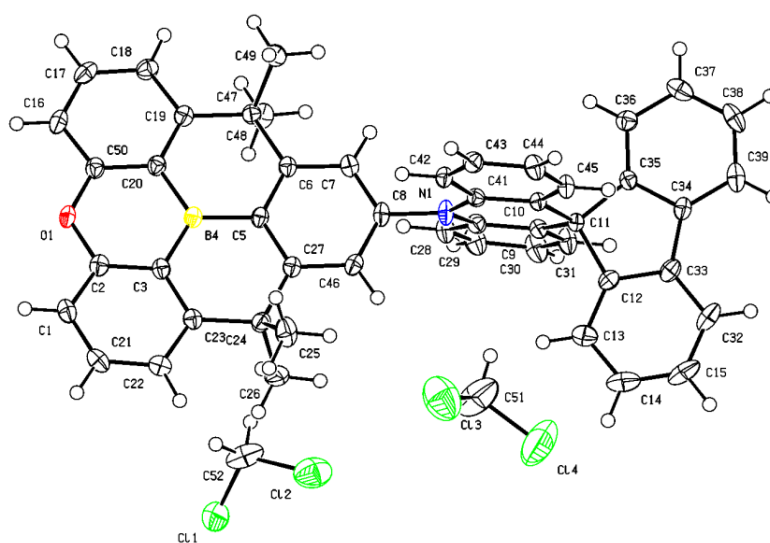**Fig. S6** ORTEP drawing of **SAC-BOC** with two dichloromethane solvent molecules (ellipsoids at 50% probability).

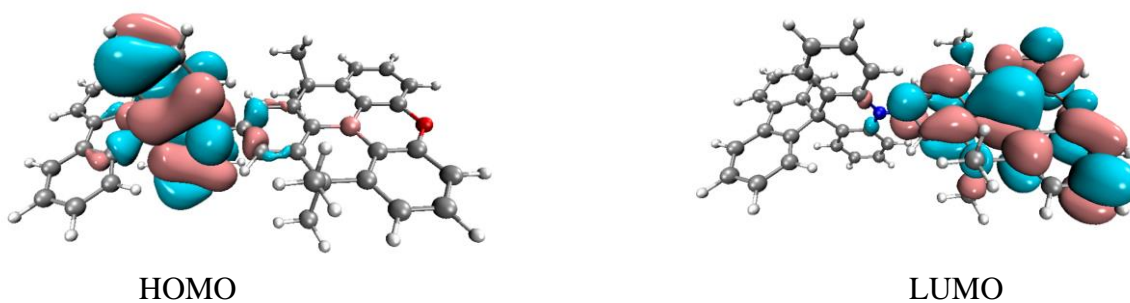

**Fig. S7** The calculated HOMO and LUMO distributions of  $S_0$  state.

**Table S4** The natural transition orbitals (NTO) of SAC-BOC in different excited states revealed by TDDFT calculations by employing the  $\omega$ B97xd functional with the 6-31+G(d) basis set.

| Excited state | Hole | Particle | Eigenvalue | Transition nature |
|---------------|------|----------|------------|-------------------|
| $S_1$         |      |          | 98.8%      | CT                |
| $T_1$         |      |          | 91.5%      | CT-dominated      |
| $T_2$         |      |          | 82.3%      | $LE_D$            |
| $T_3$         |      |          | 90.9%      | $LE_A$ -dominated |

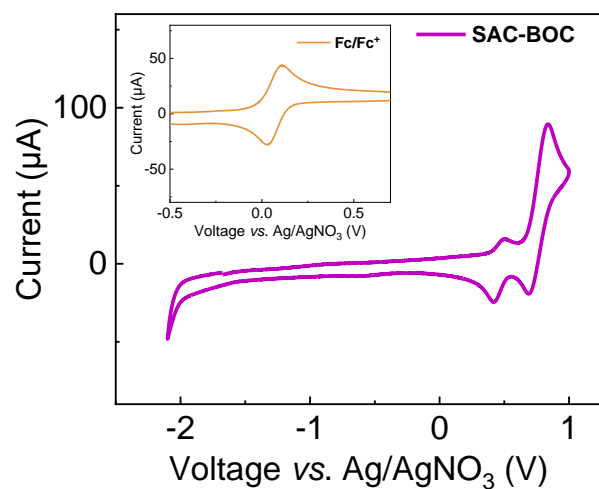

**Fig. S8** Cyclic voltammogram of **SAC-BOC** measured at a scanning rate at 100 mV/s in 0.1 M solution of tetrabutylammonium hexafluorophosphate (TBAPF<sub>6</sub>) in CH<sub>2</sub>Cl<sub>2</sub>. A Pt wire was used as the counter electrode and an Ag/Ag<sup>+</sup> electrode as the reference electrode.

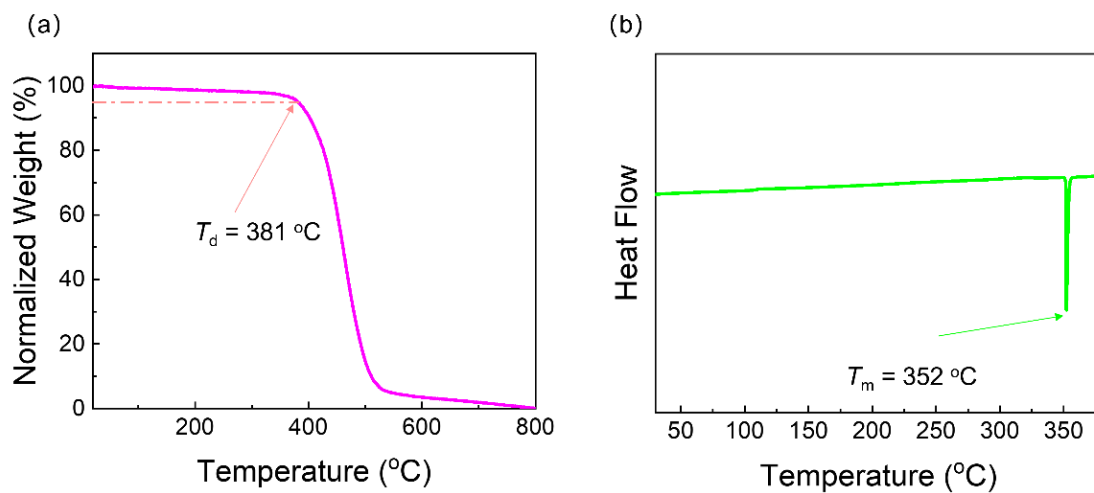

**Fig. S9** (a)TGA and (b) DSC of **SAC-BOC**.

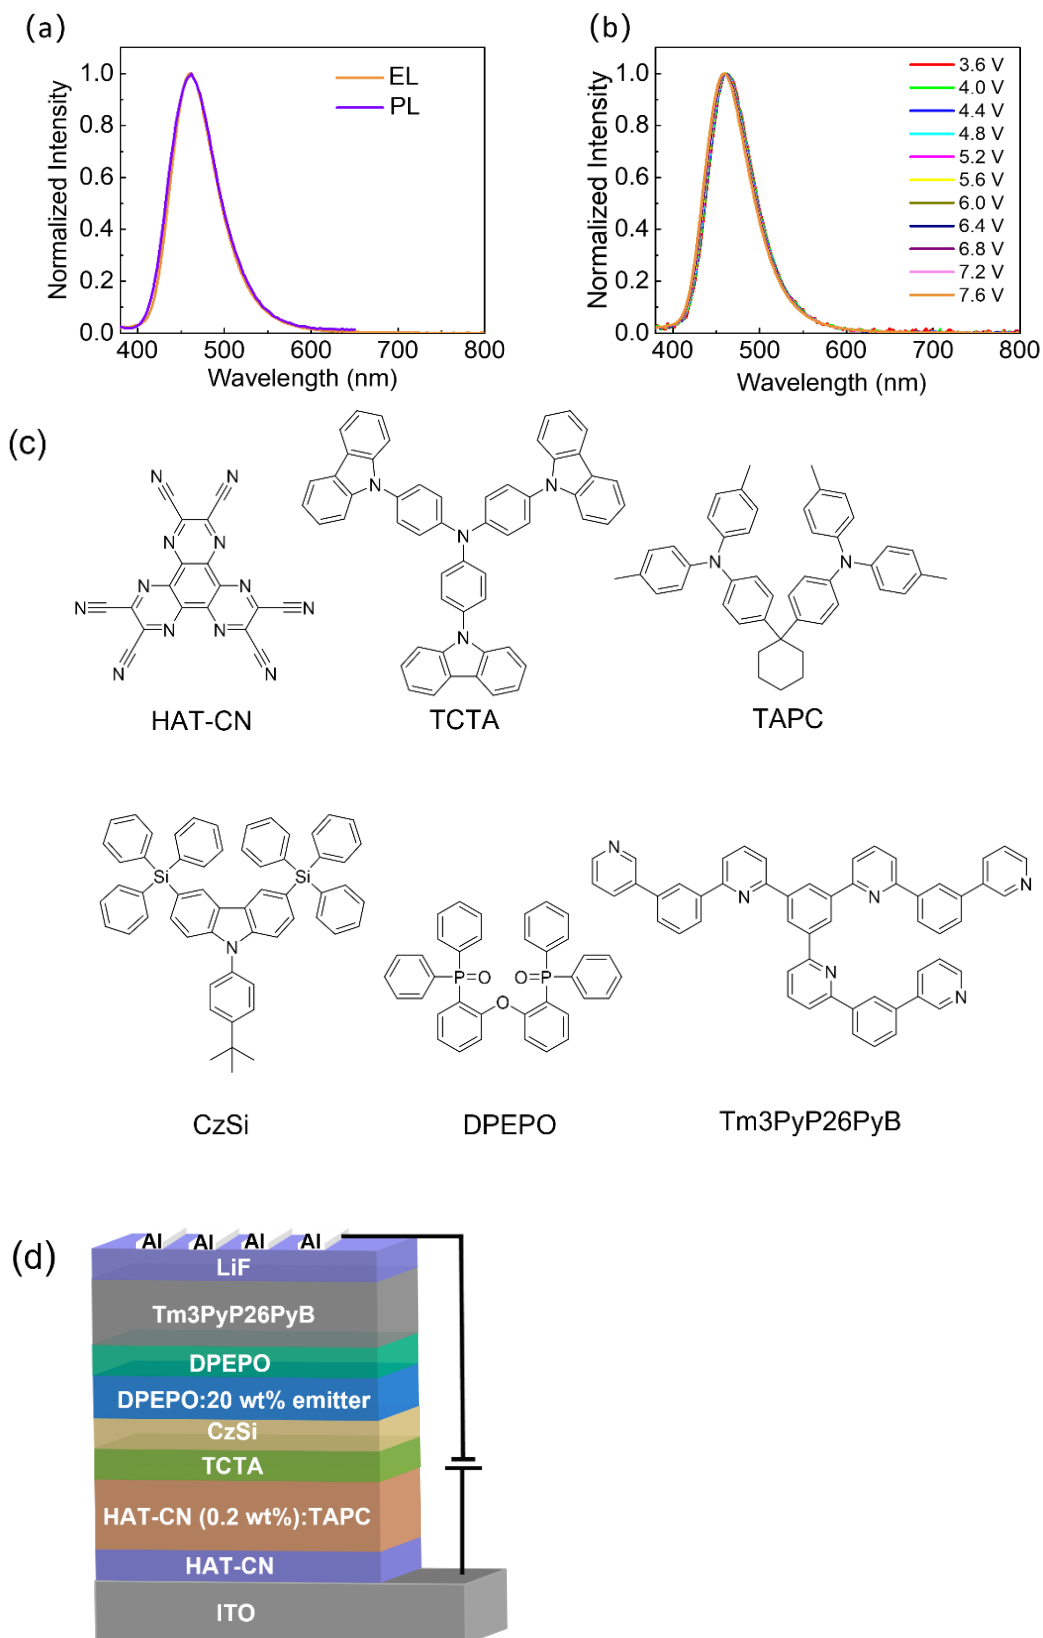

**Fig. S10** (a) EL and PL spectra. (b) EL spectra under different driving voltages. (c) Chemical structures of the materials employed in the device. (d) Configuration of the OLED.

The light-emitting layer (EML) consists of the doped film with DPEPO as the host; ITO (indium tin oxide) and Al (aluminum) serve as the anode and cathode, respectively; HAT-CN (1,4,5,8,9,11-hexaazatriphenylene hexacarbonitrile) and LiF (lithium fluoride) are employed as the hole- and electron-injecting materials, respectively; the doping of 0.2 wt% HAT-CN into TAPC (1,1-bis(4-(N,N-di(p-tolyl)amino)phenyl)cyclo-hexane) can not only help to facilitate the hole injection process from the ITO anode into the TAPC organic layer, thus improve the balance of holes and electrons within the EML, but also help to reduce the device operation voltage; TCTA (tris(4-(9H-carbazol-9-yl)phenyl)amine), as well as Tm3PyP26PyB (1,3,5-tris(6-(3-(pyridin-3-yl)phenyl)pyridin-2-yl)benzene) act as the hole- and electron-transporting materials, respectively; CzSi (9-(4-tertbutylphenyl)-3,6-bis(triphenylsilyl)-9H-carbazole) and DPEPO are adopted as exciton-blocking materials to confine excitons within EML due to their high triplet energy levels.

**Table S5** Summarized the SAC-BOC-based device data.

| $V_{on}$<br>(V) | $\lambda_{EL,max}$<br>(nm) | FWHM<br>(nm) | $L_{max}$<br>( $cd \cdot m^{-2}$ ) | $CE_{max}$<br>( $cd/A$ ) | $PE_{max}$<br>( $lm/W$ ) | $EQE_{max}$ | $CIE_{x,y}$    |
|-----------------|----------------------------|--------------|------------------------------------|--------------------------|--------------------------|-------------|----------------|
| 3.5             | 460                        | 57           | 112                                | 16.1                     | 14.4                     | 15.3%       | (0.144, 0.129) |

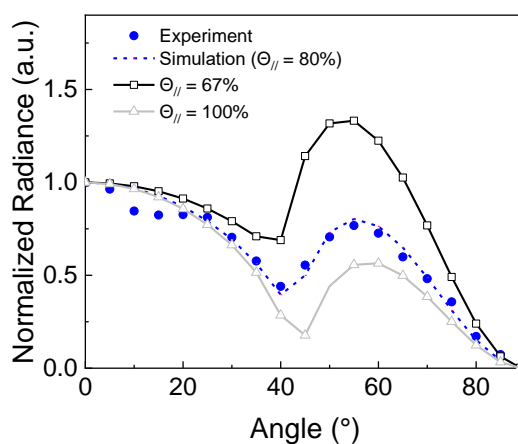

**Figure S11.** *p*-polarized angle-dependent PL radiance of the 20 wt% SAC-BOC doped film in DPEPO matrix.

### III. Summary of the performance of reported purely organic small-molecule deep blue-OLEDs based on the SAC unit.

**Table S6** Summary of the performance of deep-blue OLEDs based on the SAC unit reported so far.

| Name                  | Compound                                                                            | $\lambda_{em,EL}$<br>(nm) | $EQE_{max}$ | $CE_{max}$<br>(cd/A) | $PE_{max}$<br>(lm/W) | FWHM<br>(nm)    | CIE<br>(x, y)  | Ref.      |
|-----------------------|-------------------------------------------------------------------------------------|---------------------------|-------------|----------------------|----------------------|-----------------|----------------|-----------|
| <b>SAC-BOC</b>        | 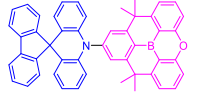   | 460                       | 15.3%       | 16.1                 | 14.4                 | 57              | (0.144, 0.129) | This work |
| <b>FA-TA</b>          |    | 454                       | 11.2%       | -                    | -                    | 69 <sup>a</sup> | (0.15, 0.13)   | [5]       |
| <b>SPAC-DMT</b>       |    | 455 <sup>a</sup>          | 9.0%        | 11.4                 | -                    | 42 <sup>a</sup> | (0.15, 0.13)   | [6]       |
| <b>D1-DPS</b>         |   | 441                       | 4.13%       | -                    | -                    | 54 <sup>a</sup> | (0.153, 0.064) | [7]       |
| <b>3,4-Cz-SF-SFAC</b> |  | 457                       | 31.05%      | 37.23                | 38.95                | 78 <sup>a</sup> | (0.15, 0.15)   | [8]       |
| <b>imM-SPAC</b>       |  | 451 <sup>a</sup>          | 11.8%       | 14.0                 | 13.0                 | 70 <sup>a</sup> | (0.16, 0.15)   | [9]       |
| <b>PM-SPAc</b>        |  | 438                       | 3.7%        | 3.01                 | 1.39                 | 83 <sup>a</sup> | (0.16, 0.12)   | [10]      |
| <b>TDBA-SAF</b>       |  | 456                       | 28.2%       | 23.7                 | 19.9                 | 55 <sup>a</sup> | (0.142, 0.090) | [11]      |
| <b>sAC-sDBB</b>       |  | 444                       | 25.4%       | 14.8                 | 13.7                 | 49              | (0.151, 0.058) | [12]      |
| <b>sAC-DBB</b>        |  | 437                       | 16.2%       | 8.7                  | 6.8                  | 50              | (0.166, 0.066) | [12]      |
| <b>SAFpCN</b>         |  | 432                       | 4.63%       | 6.54                 | 5.63                 | 56              | (0.153, 0.054) | [13]      |
| <b>SAFmCN</b>         |  | 413                       | 3.18%       | 3.86                 | 2.50                 | 50              | (0.160, 0.046) | [13]      |

|                 |                                                                                     |     |       |      |      |    |                |      |
|-----------------|-------------------------------------------------------------------------------------|-----|-------|------|------|----|----------------|------|
| <b>TFPy2</b>    | 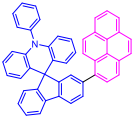   | 414 | 3.8%  | 1    | 0.84 | 51 | (0.15, 0.03)   | [14] |
| <b>TFPy3</b>    |    | 406 | 4.8%  | 0.5  | 0.43 | 50 | (0.16, 0.02)   | [14] |
| <b>TFPy4</b>    |    | 404 | 5.1%  | 0.5  | 0.40 | 54 | (0.16, 0.02)   | [14] |
| <b>DTPSAF</b>   |    | 460 | 5.7%  | -    | 6.9  | 67 | (0.143, 0.131) | [15] |
| <b>DTTSAF</b>   |    | 448 | 6.2%  | -    | 4.8  | 68 | (0.147, 0.096) | [15] |
| <b>DTXSAF</b>   |   | 444 | 7.7%  | -    | 5.2  | 68 | (0.149, 0.082) | [15] |
| <b>SAF-2CzB</b> |  | 440 | 0.48% | 4.07 | 1.83 | -  | (0.161, 0.111) | [16] |
| <b>SAF-BPI</b>  |  | 448 | -     | 3.95 | 2.08 | -  | (0.15, 0.10)   | [17] |
| <b>SAFPI</b>    |  | 428 | 4.57% | 2.90 | 2.84 | 55 | (0.156, 0.053) | [18] |
| <b>SAFDPI</b>   |  | 432 | 4.77% | 4.23 | 4.39 | 61 | (0.154, 0.092) | [18] |

<sup>a</sup> Estimated value according to the spectra in the literatures.



---

#### IV. References

1. F. Neese, *Wiley Interdiscip. Rev.: Comput. Mol. Sci.*, 2022, **12**, e1606.
2. J. R. Reimers, *J. Chem. Phys.*, 2001, **115**, 9103-9109.
3. A. Shuto, T. Kushida, T. Fukushima, H. Kaji and S. Yamaguchi, *Org. Lett.*, 2013, **15**, 6234-6237.
4. M. Melāimi, S. Solé, C.-W. Chiu, H. Wang and F. P. Gabbaï, *Inorg. Chem.*, 2006, **45**, 8136-8143.
5. Y. Wada, S. Kubo and H. Kaji, *Adv. Mater.*, 2018, **30**, 1705641.
6. D. H. Ahn, J. H. Jeong, J. Song, J. Y. Lee and J. H. Kwon, *ACS Appl. Mater. Interfaces*, 2018, **10**, 10246-10253.
7. I. H. Lee, K. J. Kim, Y. K. Kim, Y. S. Kim and D. Myung, *J. Nanosci. Nanotechnol.*, 2019, **19**, 4583-4589.
8. J. Zhang, D. Li, W. Li, Y. Meng and Z. Ge, *Laser Photonics Rev.*, 2023, 2300758.
9. R.-H. Yi, G.-Y. Liu, Y.-T. Luo, W.-Y. Wang, H.-Y. Tsai, C.-H. Lin, H.-L. Shen, C.-H. Chang and C.-W. Lu, *Chem. Eur. J.*, 2021, **27**, 12998-13008.
10. B. Li, Z. Ding, Z. Wu, M. Liu, S. Chen, D. Chen, Z. Li, L. Sang, Y. Liu, L. Lin, W. Zhu and X. Wan, *Chem. Eng. J.*, 2023, **476**, 146484.
11. H. Lim, H. J. Cheon, S.-J. Woo, S.-K. Kwon, Y.-H. Kim and J.-J. Kim, *Adv. Mater.*, 2020, **32**, 2004083.
12. G. Xia, C. Qu, Y. Zhu, J. Ye, K. Ye, Z. Zhang and Y. Wang, *Angew. Chem., Int. Ed.*, 2021, **60**, 9598-9603.
13. T. Sudyoadsuk, S. Petdee, C. Kaiyasuan, C. Chaiwai, P. Wongkaew, S. Namuangruk, P. Chasing and V. Promarak, *J. Mater. Chem. C*, 2021, **9**, 6251-6256.
14. S.-N. Zou, X. Chen, S.-Y. Yang, S. Kumar, Y.-K. Qu, Y.-J. Yu, M.-K. Fung, Z.-Q. Jiang and L.-S. Liao, *Adv. Opt. Mater.*, 2020, **8**, 2001074.
15. S.-J. Woo, Y. Kim, M.-J. Kim, J. Y. Baek, S.-K. Kwon, Y.-H. Kim and J.-J. Kim, *Chem. Mater.*, 2018, **30**, 857-863.
16. W. Sun, N. Zhou, Y. Xiao, S. Wang and X. Li, *Dyes Pigm.*, 2018, **154**, 30-37.
17. W. Sun, N. Zhou, Y. Xiao, S. Wang and X. Li, *Chem. Asian J.*, 2017, **12**, 3069-3076.
18. C. Kaiyasuan, P. Chasing, P. Nalaoh, P. Wongkaew, T. Sudyoadsuk, K. Kongpatpanich and V. Promarak, *Chem. Asian J.*, 2021, **16**, 2328-2337.
